# Supplementary material for: Solution combustion synthesis of Ni-based hybrid metal oxides for oxygen evolution reaction in alkaline medium
Source: Royal Society of Chemistry journal article supplement (doi:10.1039/d1ra07304d), 2022-01-01

## Supplementary Information

### **Solution Combustion Synthesis of Ni-based Hybrid Metal Oxides for Oxygen Evolution Reaction in Alkaline Medium**

Aymen S. Abu Hatab,<sup>a,b</sup> Yahia H. Ahmad,<sup>c</sup> Mohd. B. Abdul Rahman,<sup>\*a,b</sup> Siham Y. Al-Qaradawi <sup>\*c</sup>

<sup>a</sup>Department of Chemistry, Faculty of Science, Universiti Putra Malaysia UPM, 43400 Serdang, Selangor, Malaysia

<sup>b</sup>Integrated Chemical BioPhysics Research, Faculty of Science, Universiti Putra Malaysia UPM, 43400 Serdang, Selangor, Malaysia

<sup>c</sup>Department of Chemistry and Earth Sciences, College of Arts and Sciences, Qatar University, Doha 2713, Qatar

\* [basya@upm.edu.my](mailto:basya@upm.edu.my), [siham@qu.edu.qa](mailto:siham@qu.edu.qa)

**Table 1S.** Area ratio of deconvoluted XPS spectra of Ni<sup>3+</sup>/Ni<sup>2+</sup> and M<sup>n+m</sup>/M<sup>n+</sup> NiO and the hybrid binary Ni<sub>x</sub>M<sub>1-x</sub>O<sub>y</sub> materials

| Catalyst                                           | Area Ratio of Ni <sup>3+</sup> /Ni <sup>2+</sup> | Area Ratio of M <sup>n+m</sup> / M <sup>n+</sup> |
|----------------------------------------------------|--------------------------------------------------|--------------------------------------------------|
| NiO                                                | 0.75                                             | -                                                |
| <b>Ni<sub>x</sub>Co<sub>1-x</sub>O<sub>y</sub></b> | <b>1.00</b>                                      | <b>1.51</b>                                      |
| Ni <sub>x</sub> Fe <sub>1-x</sub> O <sub>y</sub>   | 0.88                                             | 0.81                                             |
| Ni <sub>x</sub> Mn <sub>1-x</sub> O <sub>y</sub>   | 0.77                                             | 0.65                                             |
| Ni <sub>x</sub> Mo <sub>1-x</sub> O <sub>y</sub>   | 0.92                                             | 0.87                                             |
| Ni <sub>x</sub> Cu <sub>1-x</sub> O <sub>y</sub>   | 0.82                                             | 0.67                                             |
| Ni <sub>x</sub> Cr <sub>1-x</sub> O <sub>y</sub>   | 0.85                                             | 0.71                                             |

**Fig S1.** EDX analysis of (a) NiO, (b) Ni<sub>x</sub>Co<sub>1-x</sub>O<sub>y</sub>, (c) Ni<sub>x</sub>Fe<sub>1-x</sub>O<sub>y</sub>, (d) Ni<sub>x</sub>Mn<sub>1-x</sub>O<sub>y</sub>, (e) Ni<sub>x</sub>Mo<sub>1-x</sub>O<sub>y</sub>, (f) Ni<sub>x</sub>Cu<sub>1-x</sub>O<sub>y</sub> and (g) Ni<sub>x</sub>Cr<sub>1-x</sub>O<sub>y</sub>.

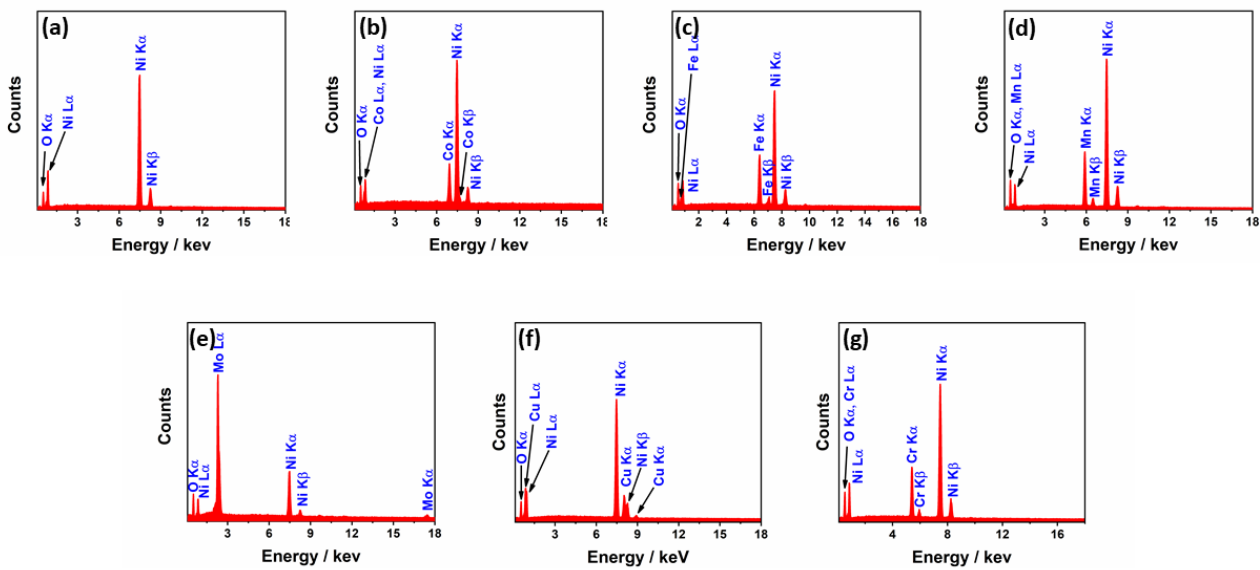

**Fig. S2** Pore size distribution of (a) NiO, (b) Ni<sub>x</sub>Co<sub>1-x</sub>O<sub>y</sub>, (c) Ni<sub>x</sub>Fe<sub>1-x</sub>O<sub>y</sub>, (d) Ni<sub>x</sub>Mn<sub>1-x</sub>O<sub>y</sub>, (e) Ni<sub>x</sub>Mo<sub>1-x</sub>O<sub>y</sub>, (f) Ni<sub>x</sub>Cu<sub>1-x</sub>O<sub>y</sub> and (g) Ni<sub>x</sub>Cr<sub>1-x</sub>O<sub>y</sub>.

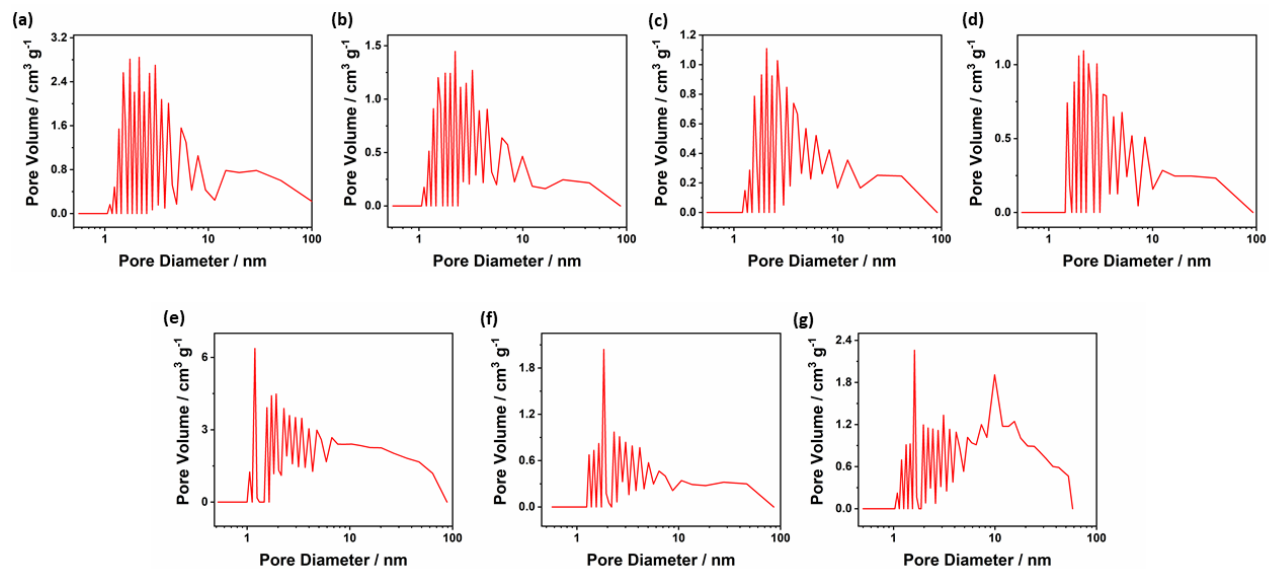

Fig. S3 XRD pattern of NiO

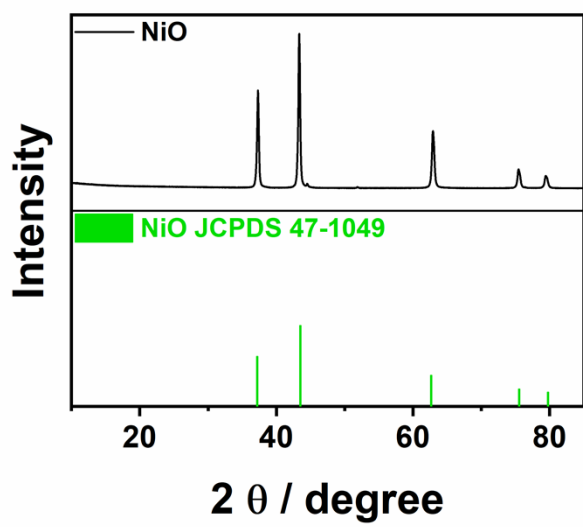

Fig. S4 XRD pattern of  $\text{Ni}_x\text{Co}_{1-x}\text{O}_y$

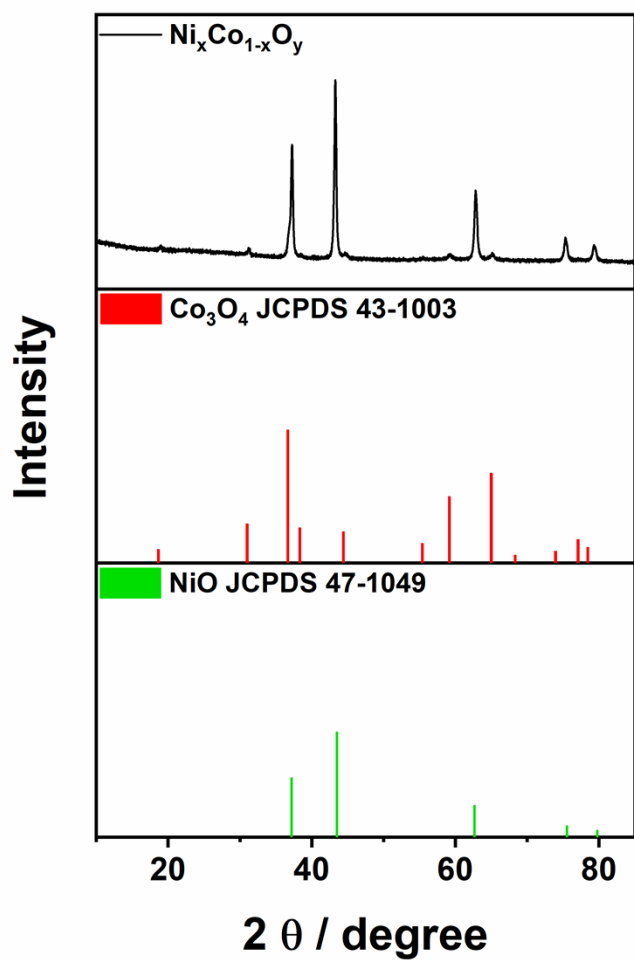

Fig. S5 XRD pattern of  $\text{Ni}_x\text{Fe}_{1-x}\text{O}_y$

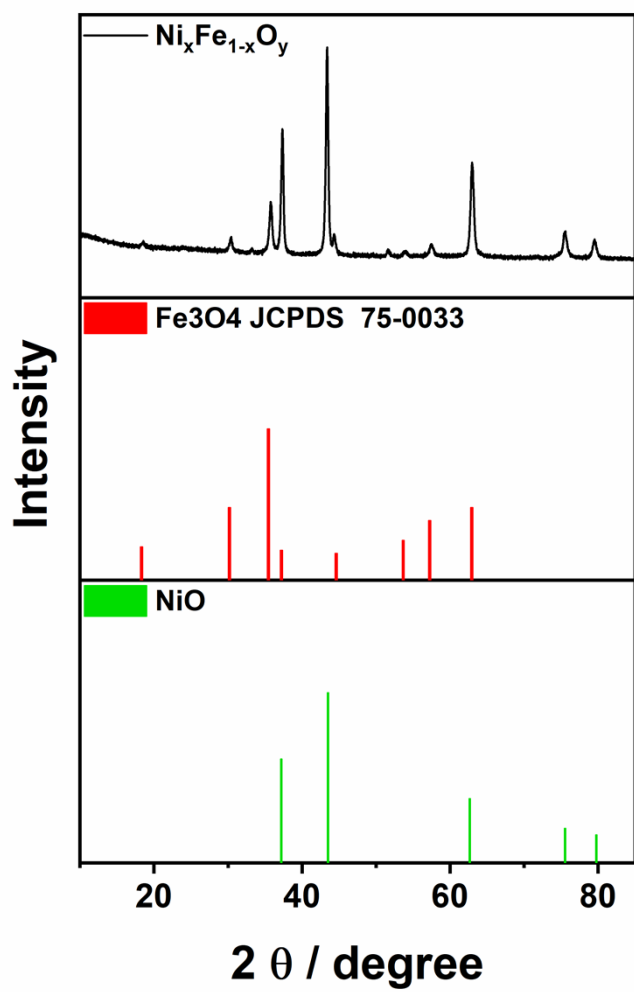

Fig. S6 XRD pattern of  $\text{Ni}_x\text{Mn}_{1-x}\text{O}_y$

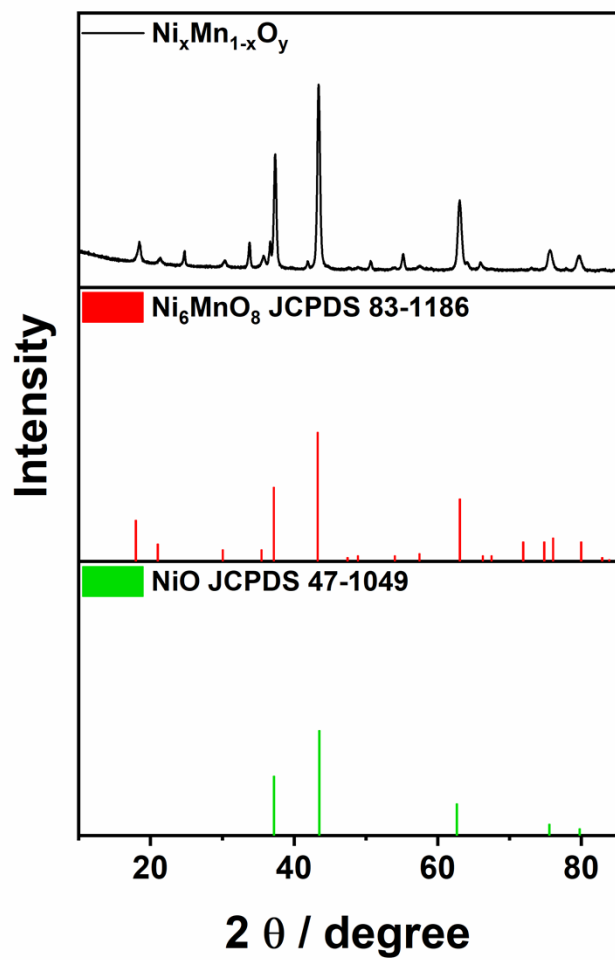



Fig. S7 XRD pattern of  $\text{Ni}_x\text{Mo}_{1-x}\text{O}_y$

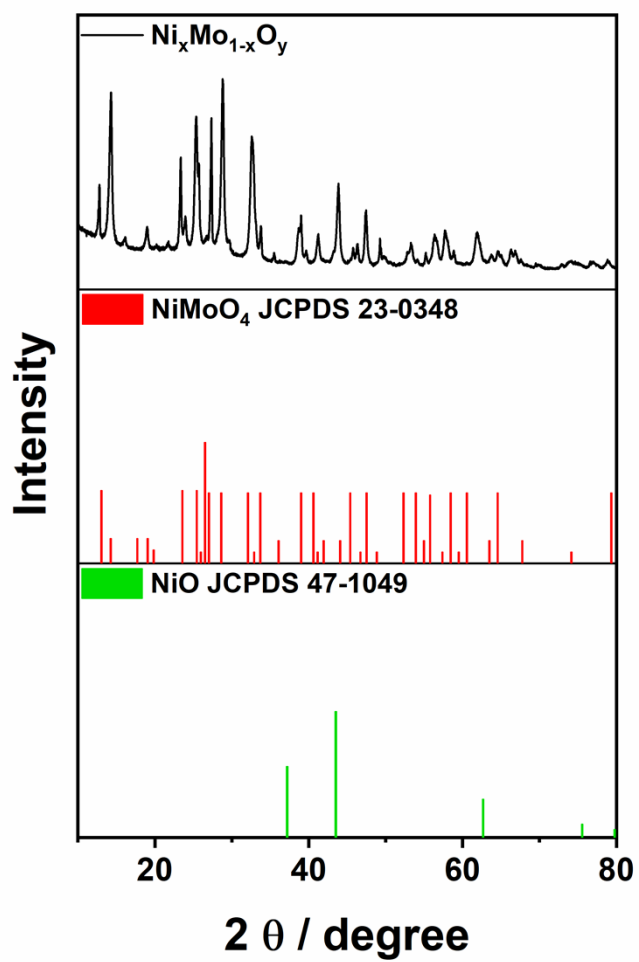

Fig. S8 XRD pattern of  $\text{Ni}_x\text{Cu}_{1-x}\text{O}_y$

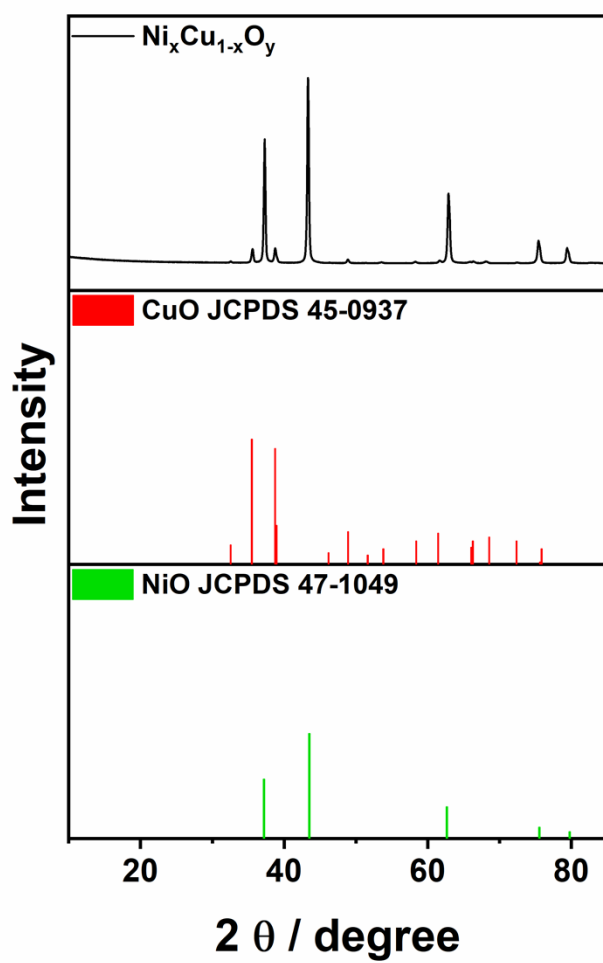

Fig. S9 XRD pattern of  $\text{Ni}_x\text{Cr}_{1-x}\text{O}_y$

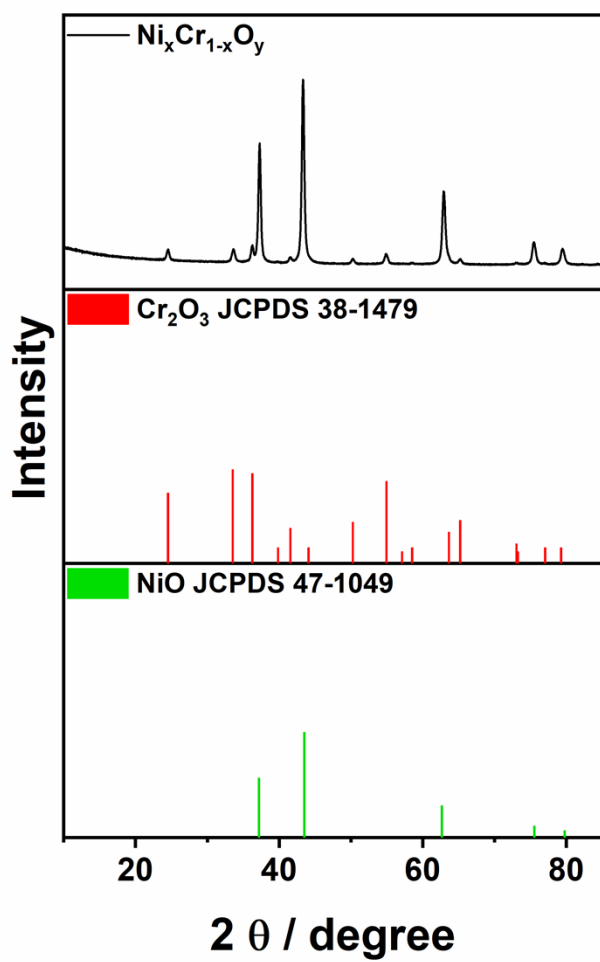

**Fig. S10** Detailed XPS survey spectra of (a) NiO, (b) Ni<sub>x</sub>Co<sub>1-x</sub>O<sub>y</sub>, (c) Ni<sub>x</sub>Fe<sub>1-x</sub>O<sub>y</sub>, (d) Ni<sub>x</sub>Mn<sub>1-x</sub>O<sub>y</sub>, (e) Ni<sub>x</sub>Mo<sub>1-x</sub>O<sub>y</sub>, (f) Ni<sub>x</sub>Cu<sub>1-x</sub>O<sub>y</sub> and (g) Ni<sub>x</sub>Cr<sub>1-x</sub>O<sub>y</sub>.

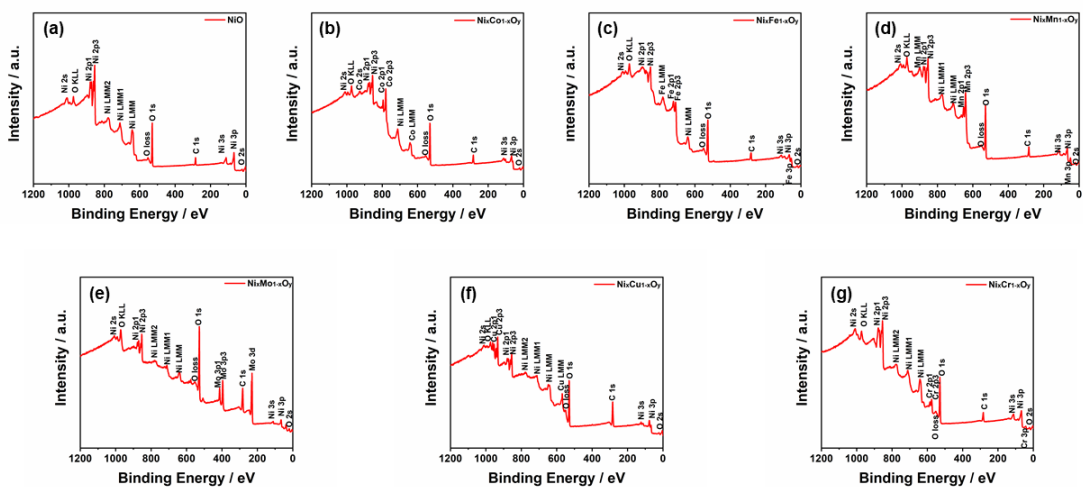

**Fig. S11** O1S spectrum for (a) NiO, (b) Ni<sub>x</sub>Co<sub>1-x</sub>O<sub>y</sub>, (c) Ni<sub>x</sub>Fe<sub>1-x</sub>O<sub>y</sub>, (d) Ni<sub>x</sub>Mn<sub>1-x</sub>O<sub>y</sub>, (e) Ni<sub>x</sub>Mo<sub>1-x</sub>O<sub>y</sub>, (f) Ni<sub>x</sub>Cu<sub>1-x</sub>O<sub>y</sub> and (g) Ni<sub>x</sub>Cr<sub>1-x</sub>O<sub>y</sub>.

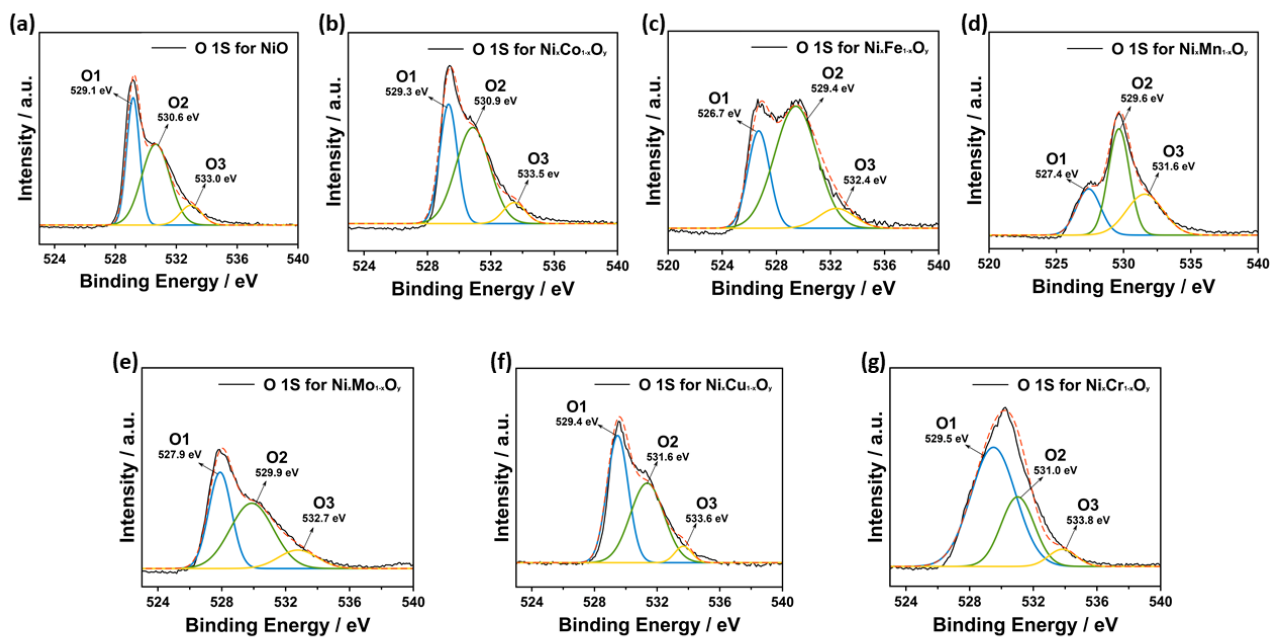

Fig. S12 XRD pattern of NiO after activity

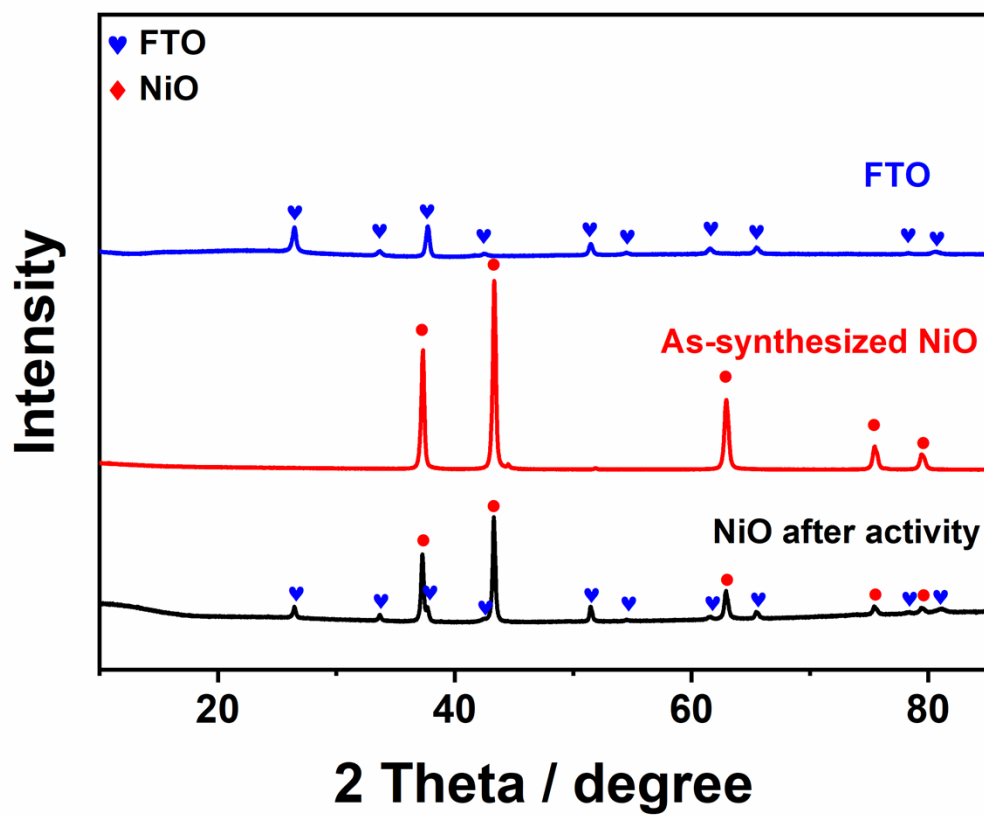

Fig. S13 XRD pattern of  $\text{Ni}_x\text{Co}_{1-x}\text{O}_y$  after activity

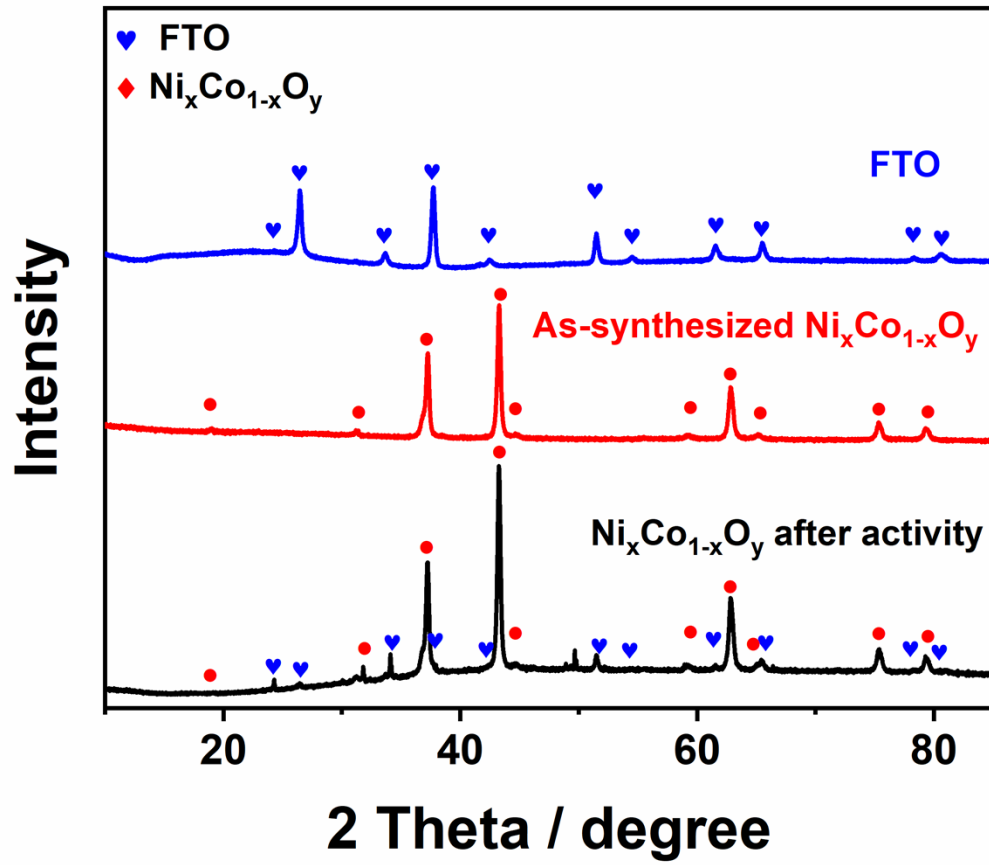

Fig. S14 XRD pattern of  $\text{Ni}_x\text{Fe}_{1-x}\text{O}_y$  after activity

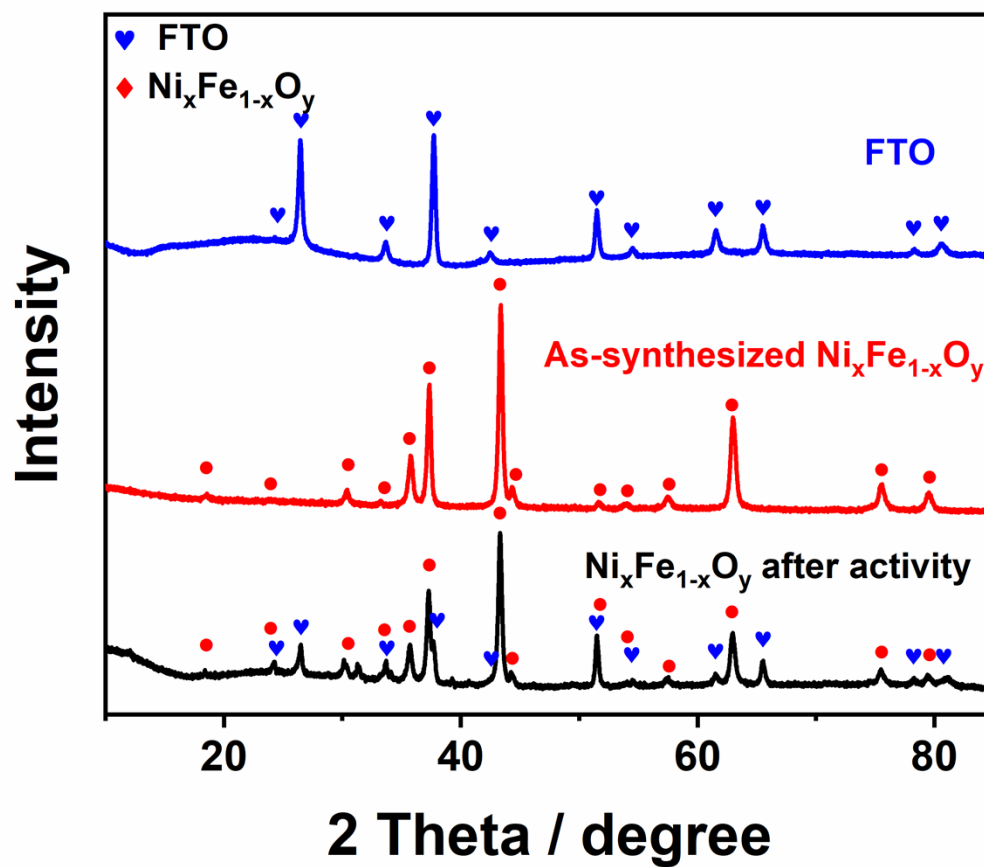



Fig. S15 XRD pattern of  $\text{Ni}_x\text{Mn}_{1-x}\text{O}_y$  after activity

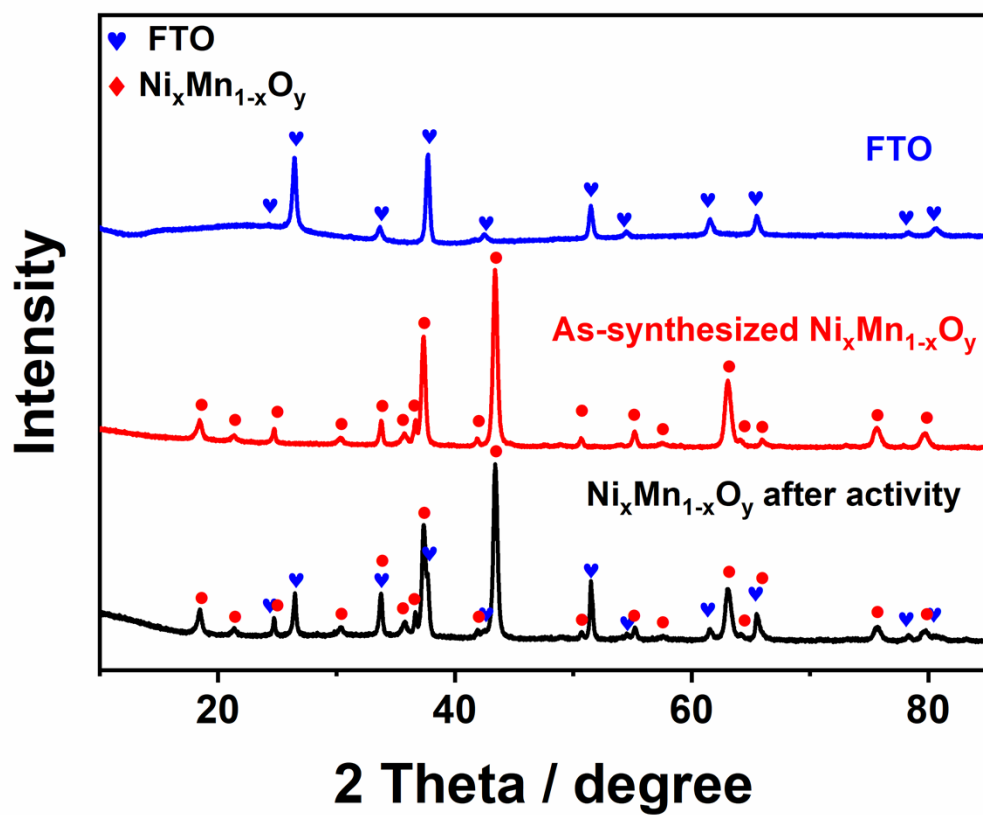

Fig. S16 XRD pattern of  $\text{Ni}_x\text{Mo}_{1-x}\text{O}_y$  after activity

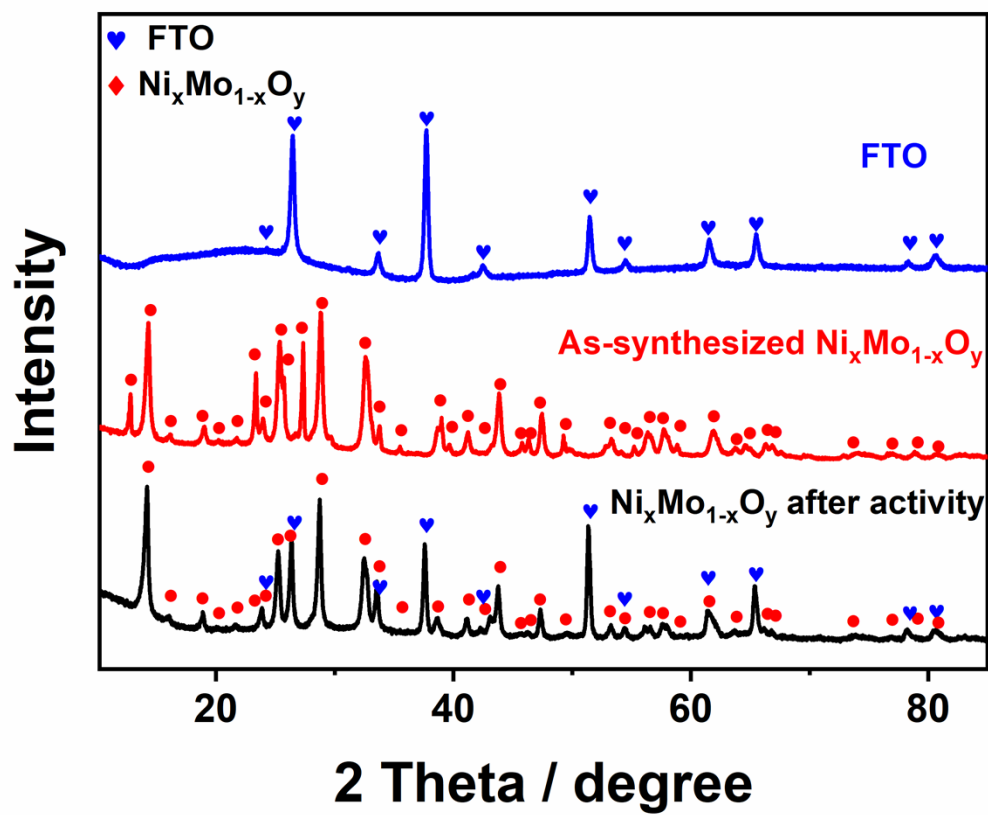

Fig. S17 XRD pattern of  $\text{Ni}_x\text{Cu}_{1-x}\text{O}_y$  after activity

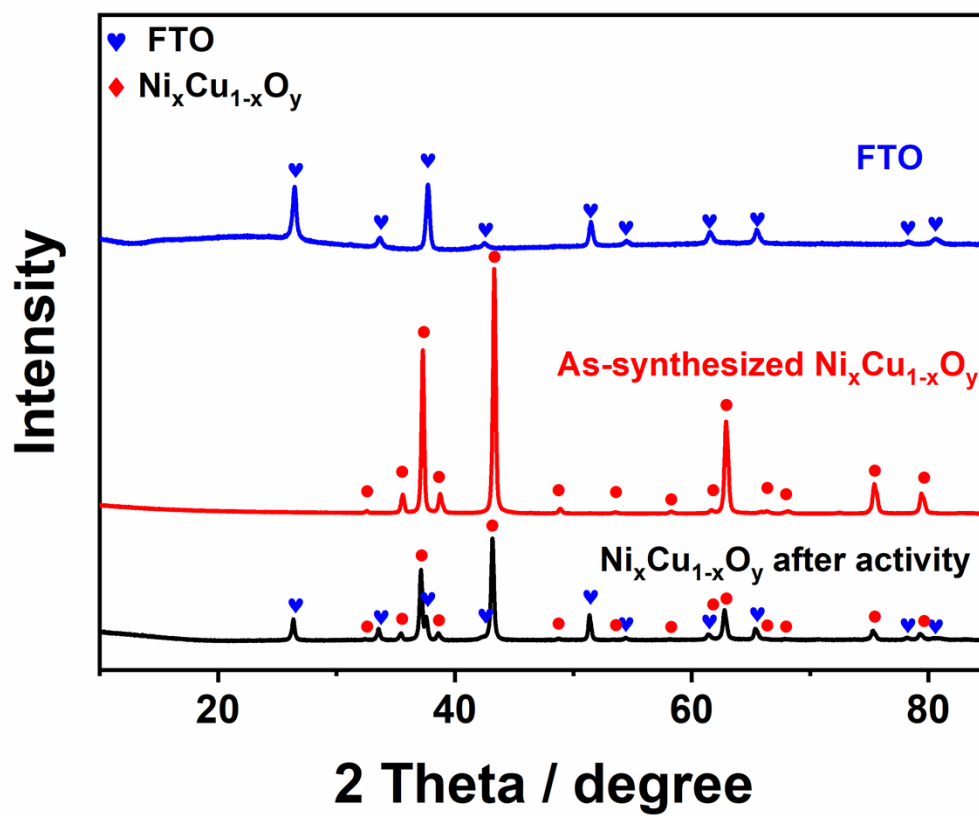

Fig. S18 XRD pattern of  $\text{Ni}_x\text{Cr}_{1-x}\text{O}_y$  after activity

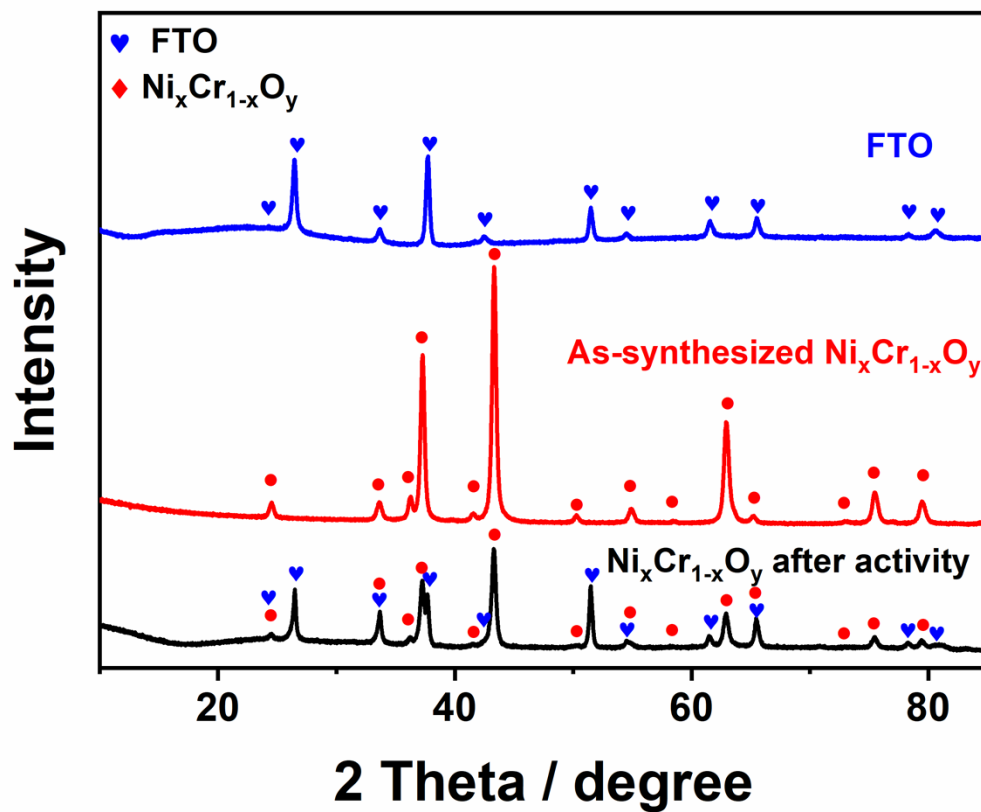

Supplement: d1ra07304d1.pdf [file d1ra07304d1.pdf]
